# Supplementary material for: Availability of Ferritin-Bound Iron to Enterobacteriaceae
Source: MDPI journal article supplement (doi:10.3390/ijms232113087), 2022-10-28
Supplement: s1 [file s1]

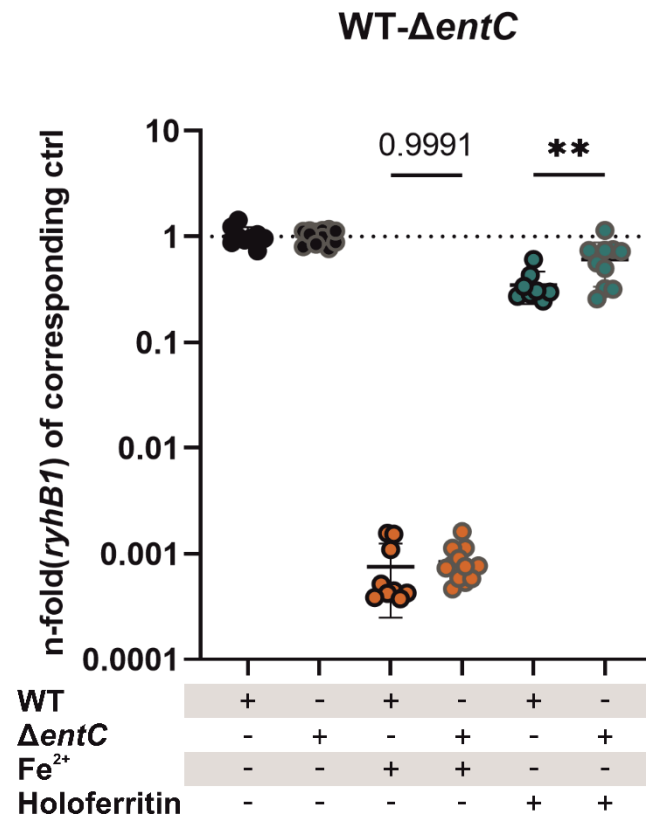

**Figure S3.** Fold change in *RyhB1* sncRNA expression normalized to the mean of the corresponding iron free control of WT *S.Tm* (N=9, n=3) and the  $\Delta$ entC strain (N=12, n=4) upon different iron sources. Expression data were normalized to their corresponding controls: WT (black circles) or  $\Delta$ entC strain (grey bordered black circles). Gene expression was normalized using the  $\Delta\Delta$ ct method using the *16S* ribosomal RNA (*16S rRNA*) and DNA-dependent RNA polymerase (*rpoB*) mRNA as reference transcripts. Graphs are depicted as mean  $\pm$  SD. For statistical analysis one-way ANOVA (a-d) corrected for multiple comparisons with the Holm-Sidak post hoc test was used (\*\*:  $p < 0.01$ , numbers indicate a non-significant  $p$ -value  $> 0.05$ ). N: number of biological replicates, n: number of experiments conducted. WT: wildtype *S.Tm*,  $\Delta$ entC: *S.Tm* enterobactin/salmochelin knockout mutant strain.
