# Supplementary material for: Availability of Ferritin-Bound Iron to Enterobacteriaceae
Source: MDPI journal article supplement (doi:10.3390/ijms232113087), 2022-10-28
Supplement: s1 [file s1]

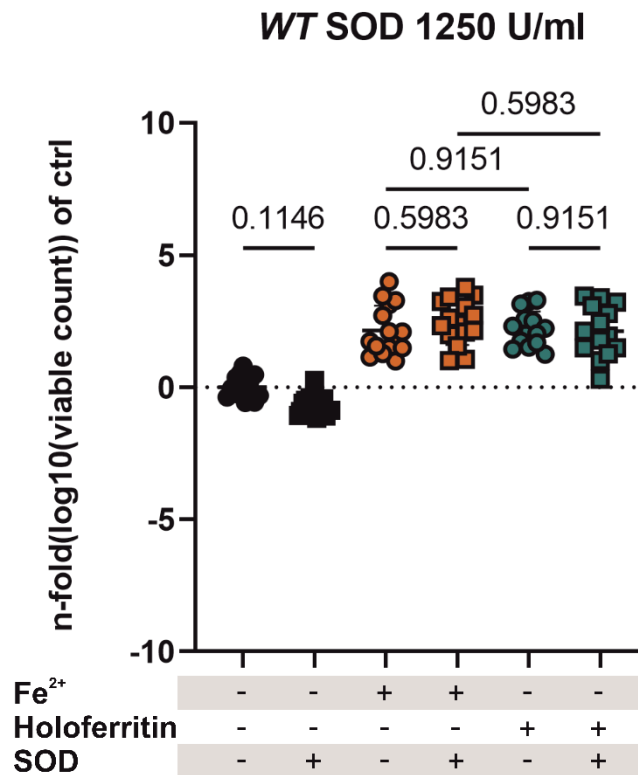

**Figure S2.** Iron-dependent growth of WT *S.Tm* (N=15, n=5) with or without SOD, depicted as squares and circles, respectively (N=15, n=5). Cultures were incubated at 5% O<sub>2</sub> 5% CO<sub>2</sub>, 37°C and 200 RPM. Growth data were logarithmized and then normalized to the corresponding control without any supplement. Expression data were normalized to their corresponding controls: no supplement (circles) or SOD (squares). Graphs are depicted as mean ± SD. For statistical analysis one-way ANOVA corrected for multiple comparisons with the Holm-Sidak post hoc test was used (numbers indicate a non-significant p-value > 0.05). N: number of biological replicates, n: number of experiments conducted. SOD: superoxide dismutase, WT: wildtype *S.Tm*.
