# Supplementary material for: Availability of Ferritin-Bound Iron to Enterobacteriaceae
Source: MDPI journal article supplement (doi:10.3390/ijms232113087), 2022-10-28
Supplement: s1 [file s1]

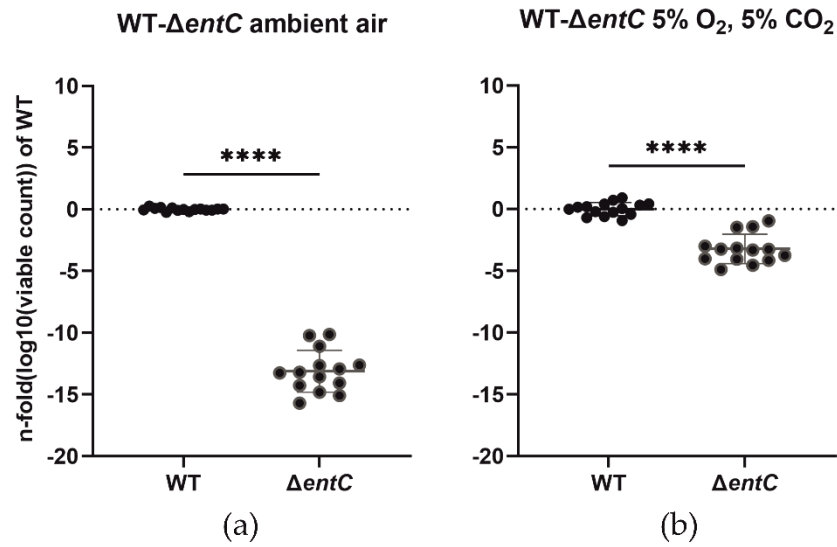

**Figure S1.** *S.Tm* ATCC 14028 and a derivative  $\Delta entC$  mutant were grown in IMDM (a) in ambient air (N=15, n=5) or (b) in 5 % O<sub>2</sub>, 5 % CO<sub>2</sub> atmosphere (N=15, n=5). Growth data were logarithmized and then normalized to the WT. Graphs are depicted as mean  $\pm$  SD. For statistical analysis Student's t-test was used (\*\*\*\*:  $p < 0.0001$ ). N: number of biological replicates, n: number of experiments conducted, WT: wildtype,  $\Delta entC$ : *S.Tm* enterobactin/salmochelin knockout mutant strain
